# Supplementary material
Source: Springer Nature journal article supplement (https://www.springermedizin.de/resource/supplementary/12990_2009_221_MOESM3_ESM.pdf/9612818)

**A**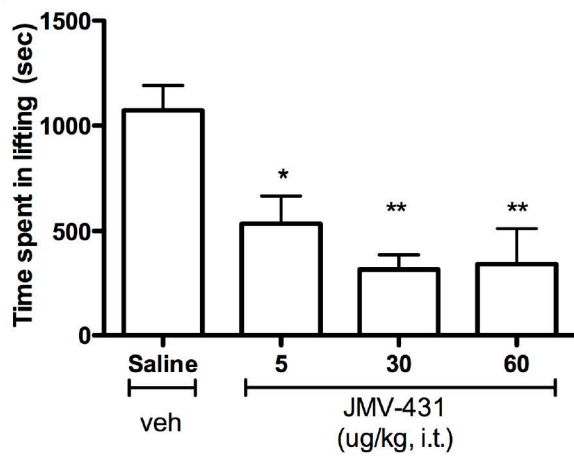**B**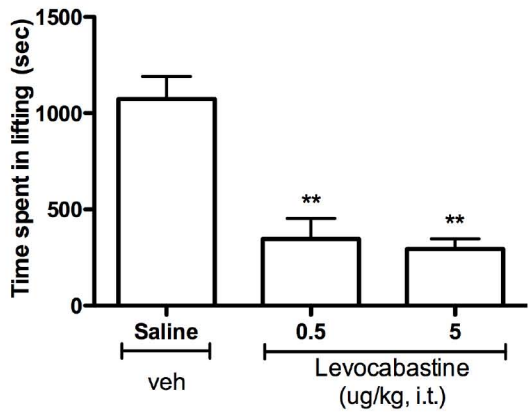**C**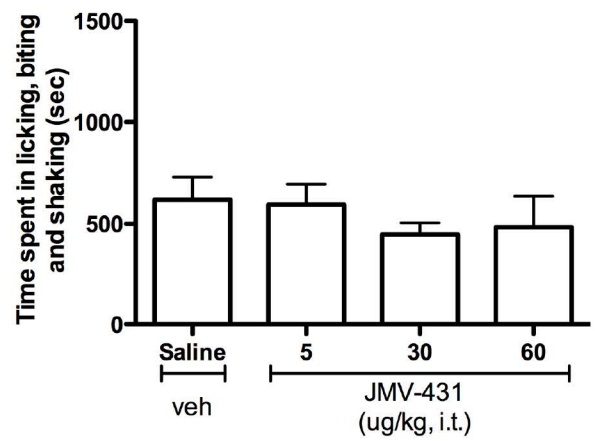**D**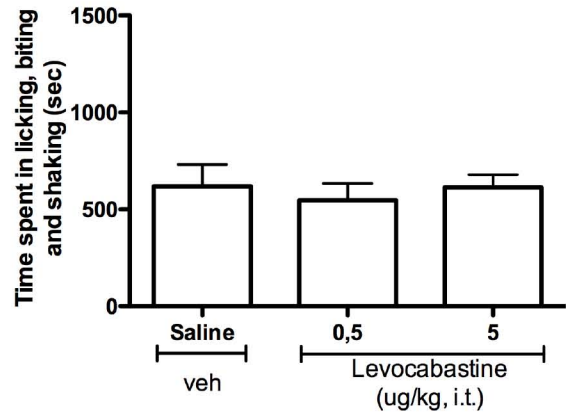

Supplement: MOESM3 [file 9612818]
